# Supplementary material
Source: HighWire-hosted journal article supplement (https://bmjopenquality.bmj.com/highwire/filestream/147599/field_highwire_adjunct_files/0/bmjqs-2012-000942supp.pdf)

## Labeled Surgical Caps Impact Communication

### **Pre-Intervention Questionnaire**

Thank you for taking the time to complete a brief assessment of culture around team communication within the operating room environment. This is an anonymous survey. Your answers will be used to drive quality improvement initiatives. In addition, the responses from this survey may be used for the purposes of research.

Q1 What is your age?

Q2 What is your gender?

- Male (1)
- Female (2)
- Non-binary / third gender (3)
- Prefer not to say (4)

Q3 What is your race/ethnicity?

- Hispanic (1)
  - Asian, non-Hispanic (2)
  - White, non-Hispanic (3)
  - Black or African American, non-Hispanic (4)
  - Native American or American Indian (5)
  - Other (6)
  - More than one race (7)
  - Prefer not to say (8)
-

## Labeled Surgical Caps Impact Communication

Q4 What is your role in the operating room?

- Anesthesia Team (1)
- Surgery Team (2)
- RN Circulator (3)
- Surgical Tech (4)
- Anesthesia Tech (5)
- Pre-op / PACU (6)
- Management (7)
- Student (8)
- Other Clinical Support Staff (9)
- Non-Clinical Role (10)

---

*Display This Question:*

*If What is your role in the operating room? = Anesthesia Team*

*Or What is your role in the operating room? = Surgery Team*

Q5 What is your provider role?

- Attending physician (1)
- Advanced Practitioner (CRNA, NP, PA) (2)
- Resident (3)
- Fellow (4)
- Student (5)
- Other (6)

### Labeled Surgical Caps Impact Communication

Q6 How long have you worked for UC San Diego Health?

0 10 20 30 40 50 60 70 80 90 100

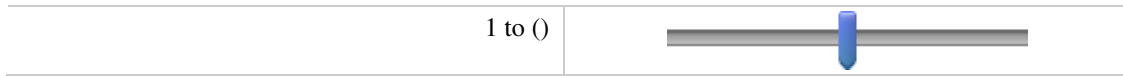

Q7 Please rate your level of agreement with the following statements:

## Labeled Surgical Caps Impact Communication

|                                                                                                    | Strongly Disagree (1) | Disagree (2)          | Neutral (3)           | Agree (4)             | Strongly Agree (5)    |
|----------------------------------------------------------------------------------------------------|-----------------------|-----------------------|-----------------------|-----------------------|-----------------------|
| In general, team COMMUNICATION around the ORs is excellent. (1)                                    | <input type="radio"/> |
| In general, team CULTURE around the ORs is excellent. (2)                                          | <input type="radio"/> |
| In general, I know the NAMES of everyone around the OR. (3)                                        | <input type="radio"/> |
| In general, I know the ROLES of everyone around the OR. (4)                                        | <input type="radio"/> |
| In general, my colleagues know my NAME. (5)                                                        | <input type="radio"/> |
| Knowing the name of an interdisciplinary team member is important to patient care. (6)             | <input type="radio"/> |
| Scrub attire and masks make it challenging to identify others. (7)                                 | <input type="radio"/> |
| I feel comfortable communicating directly and without barriers with <b>surgeons</b> . (8)          | <input type="radio"/> |
| I feel comfortable communicating directly and without barriers with <b>anesthesiologists</b> . (9) | <input type="radio"/> |

## Labeled Surgical Caps Impact Communication

I feel comfortable communicating directly and without barriers with **nurses**. (10)

I feel comfortable communicating directly and without barriers with **surgical or anesthesia technicians**. (11)

I feel comfortable wearing a labeled surgical cap. (12)

Use of labeled surgical caps is a good idea. (13)

## Labeled Surgical Caps Impact Communication

### Post-Intervention Questionnaire

Thank you for taking the time to complete a brief assessment of culture around team communication within the operating room environment. This is an anonymous survey. Your answers will be used to drive quality improvement initiatives. In addition, the responses from this survey may be used for the purposes of research.

Q1 What is your age?

Q2 What is your gender?

- Male (1)
- Female (2)
- Non-binary / third gender (3)
- Prefer not to say (4)

Q3 What is your race/ethnicity?

- Hispanic (1)
  - Asian, non-Hispanic (2)
  - White, non-Hispanic (3)
  - Black or African American, non-Hispanic (4)
  - Native American or American Indian (5)
  - Other (6)
  - More than one race (7)
  - Prefer not to say (8)
-

## Labeled Surgical Caps Impact Communication

Q4 What is your role in the operating room?

- Anesthesia Team (1)
- Surgery Team (2)
- RN Circulator (3)
- Surgical Tech (4)
- Anesthesia Tech (5)
- Pre-op / PACU (6)
- Management (7)
- Student (8)
- Other Clinical Support Staff (9)
- Non-Clinical Role (10)

---

*Display This Question:*

*If What is your role in the operating room? = Anesthesia Team*

*Or What is your role in the operating room? = Surgery Team*

Q5 What is your provider role?

- Attending physician (1)
  - Advanced Practitioner (CRNA, NP, PA) (2)
  - Resident (3)
  - Fellow (4)
  - Student (5)
  - Other (6)
-

### Labeled Surgical Caps Impact Communication

Q6 How long have your worked for UC San Diego Health?

0 10 20 30 40 50 60 70 80 90 100

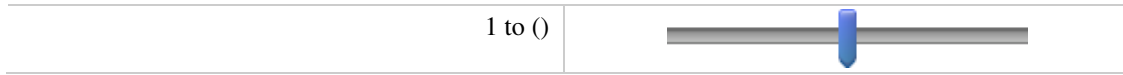



## Labeled Surgical Caps Impact Communication

| Q7 Please rate your level of agreement with the following statements:                              | Strongly Agree (1)    | Agree (2)             | Neutral (3)           | Disagree (4)          | Strongly Disagree (5) |
|----------------------------------------------------------------------------------------------------|-----------------------|-----------------------|-----------------------|-----------------------|-----------------------|
| In general, team <b>COMMUNICATION</b> around the ORs is excellent. (1)                             | <input type="radio"/> |
| In general, team <b>CULTURE</b> around the ORs is excellent. (2)                                   | <input type="radio"/> |
| In general, I know the <b>NAMES</b> of everyone around the OR. (3)                                 | <input type="radio"/> |
| In general, I know the <b>ROLES</b> of everyone around the OR. (4)                                 | <input type="radio"/> |
| In general, my colleagues know my <b>NAME</b> . (5)                                                | <input type="radio"/> |
| Knowing the name of an interdisciplinary team member is important to patient care. (6)             | <input type="radio"/> |
| Scrub attire and masks make it challenging to identify others. (7)                                 | <input type="radio"/> |
| I feel comfortable communicating directly and without barriers with <b>surgeons</b> . (8)          | <input type="radio"/> |
| I feel comfortable communicating directly and without barriers with <b>anesthesiologists</b> . (9) | <input type="radio"/> |

## Labeled Surgical Caps Impact Communication

|                                                                                                                      |                       |                       |                       |                       |                       |
|----------------------------------------------------------------------------------------------------------------------|-----------------------|-----------------------|-----------------------|-----------------------|-----------------------|
| I feel comfortable communicating directly and without barriers with <b>nurses</b> . (10)                             | <input type="radio"/> |
| I feel comfortable communicating directly and without barriers with <b>surgical or anesthesia technicians</b> . (11) | <input type="radio"/> |
| I feel comfortable wearing a labeled surgical cap. (12)                                                              | <input type="radio"/> |
| Named surgical caps is a good idea. (13)                                                                             | <input type="radio"/> |

End of Block: Block 1

---

Start of Block: Block 2

## Labeled Surgical Caps Impact Communication

| Q8 Please rate your level of agreement with the following statements:           | Strongly Agree (1)    | Agree (2)             | Neutral (3)           | Disagree (4)          | Strongly Disagree (5) |
|---------------------------------------------------------------------------------|-----------------------|-----------------------|-----------------------|-----------------------|-----------------------|
| Named surgical caps improved communication in the OR. (1)                       | <input type="radio"/> |
| Named surgical caps make it easier to talk to interdisciplinary colleagues. (2) | <input type="radio"/> |
| Named surgical caps help to remove communication barriers. (3)                  | <input type="radio"/> |
| Named surgical caps help to remember who I am working with. (4)                 | <input type="radio"/> |
| Named surgical caps improve patient care. (5)                                   | <input type="radio"/> |
| Named surgical caps improve team culture. (6)                                   | <input type="radio"/> |
| Named surgical caps improve communication with <b>surgeons</b> . (7)            | <input type="radio"/> |
| Named surgical caps improve communication with <b>anesthesiologists</b> . (8)   | <input type="radio"/> |

## Labeled Surgical Caps Impact Communication

Named surgical caps improve communication with **nurses**. (9)

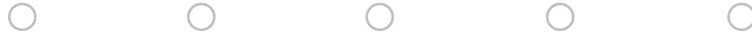

Named surgical caps improve communication with **surgical or anesthesia technicians**. (10)

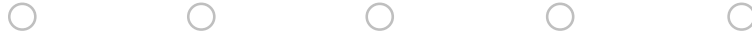

I would like UCSD to continue providing named surgical caps. (11)

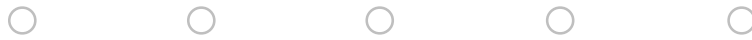

Supplement: bmjqs-2012-000942supp.pdf [file bmjqs-2012-000942supp.pdf]
